# Supplementary material for: Anti-Respiratory Syncytial Virus Activity of Plantago asiatica and Clerodendrum trichotomum Extracts In Vitro and In Vivo
Source: Viruses. 2019 Jul 3;11(7):604. doi: 10.3390/v11070604 (PMC6669655; doi:10.3390/v11070604)
Supplement: Supplementary file 1 [file viruses-11-00604-s001.pdf]

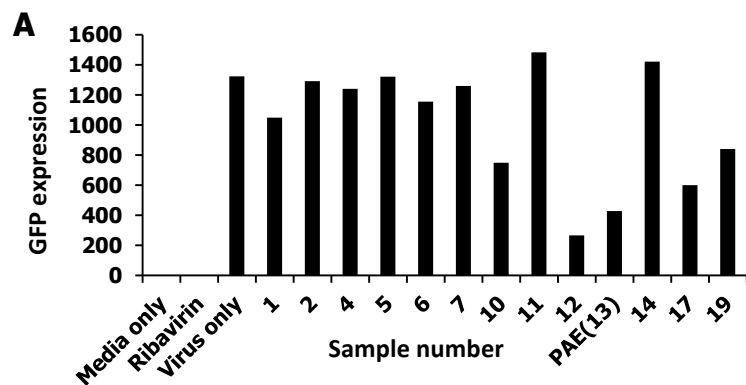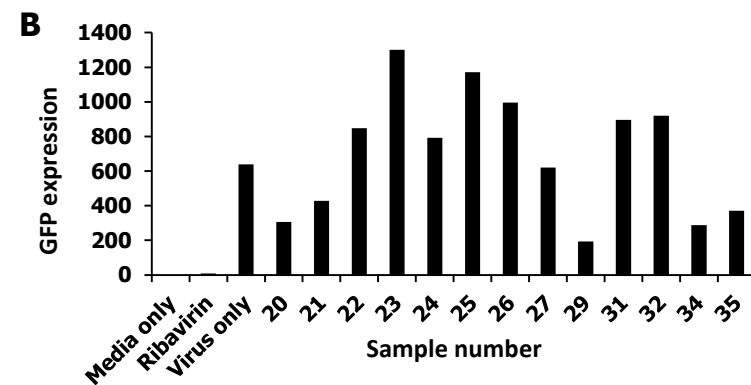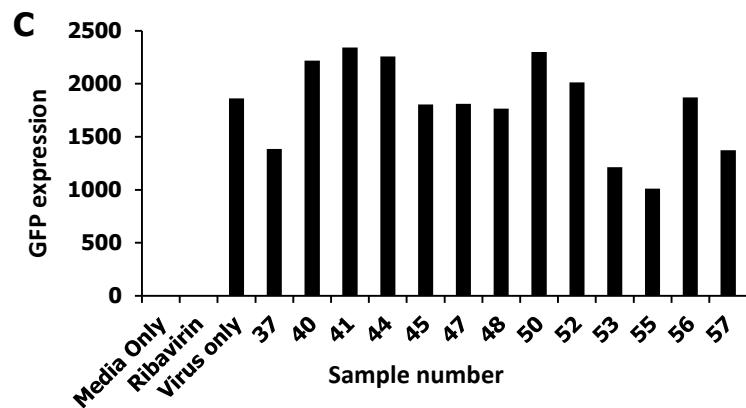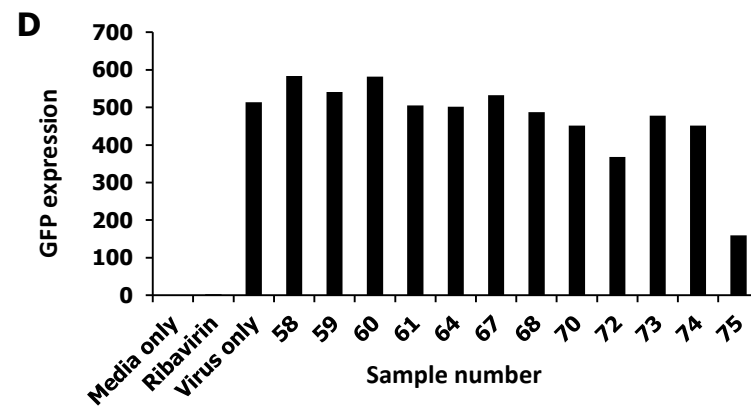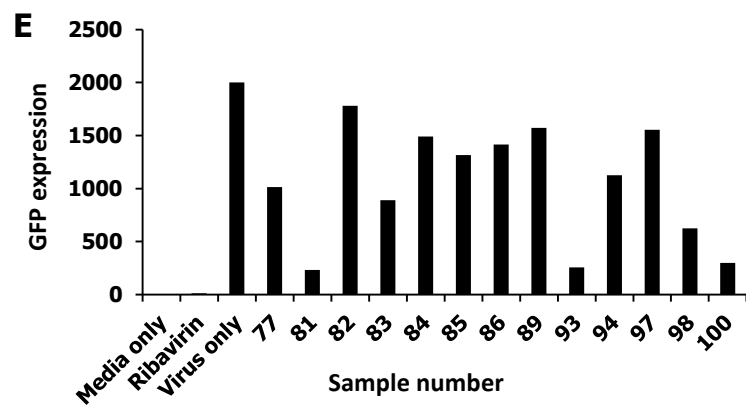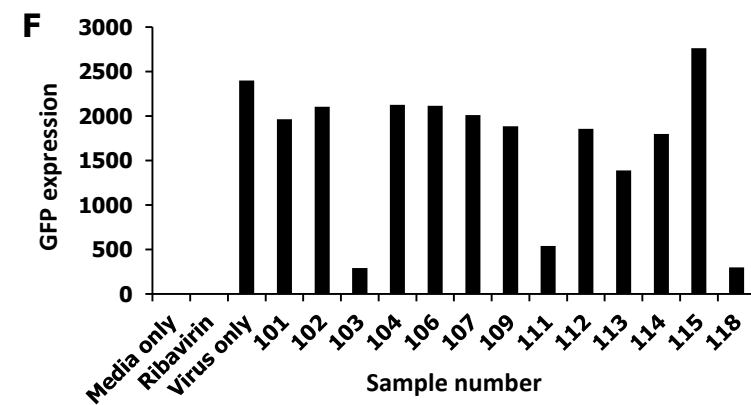

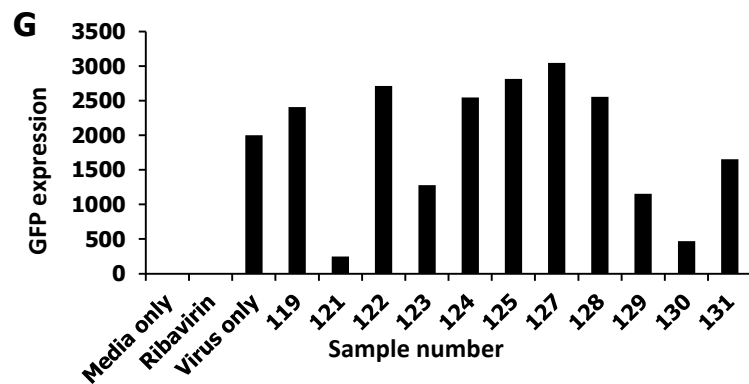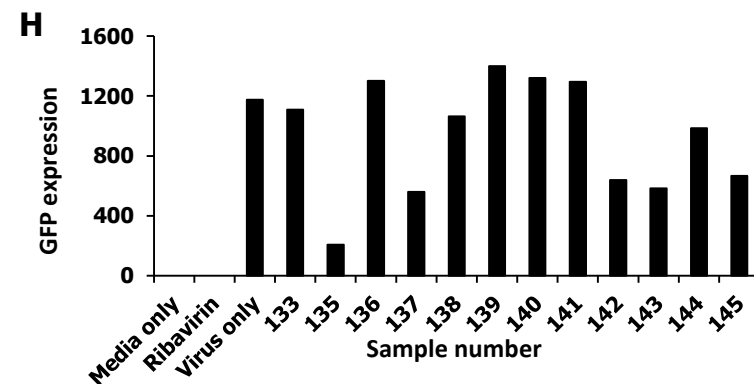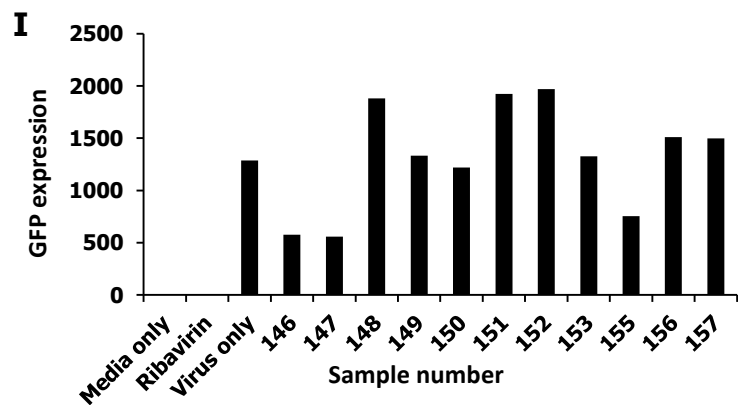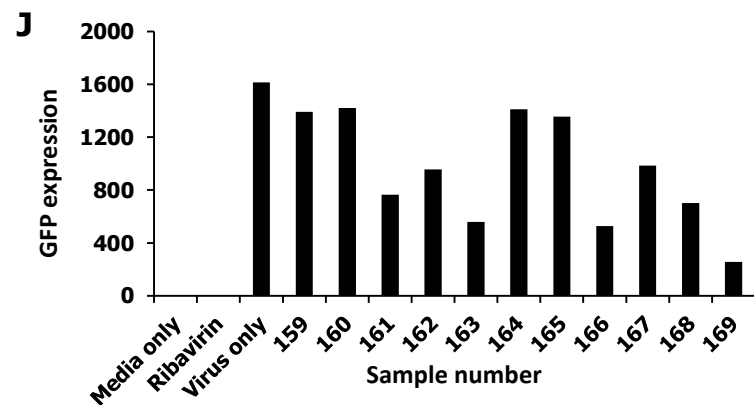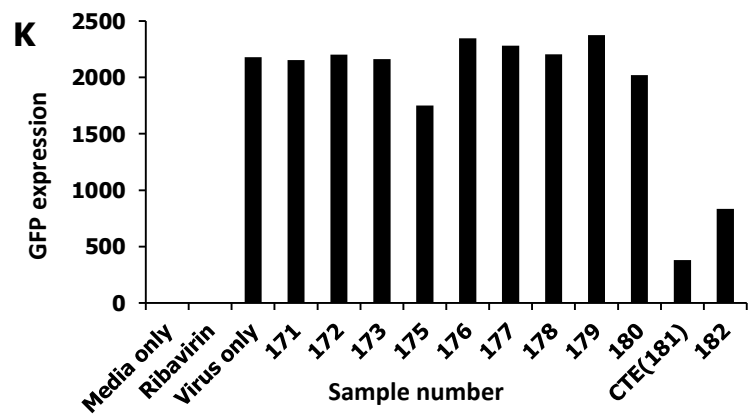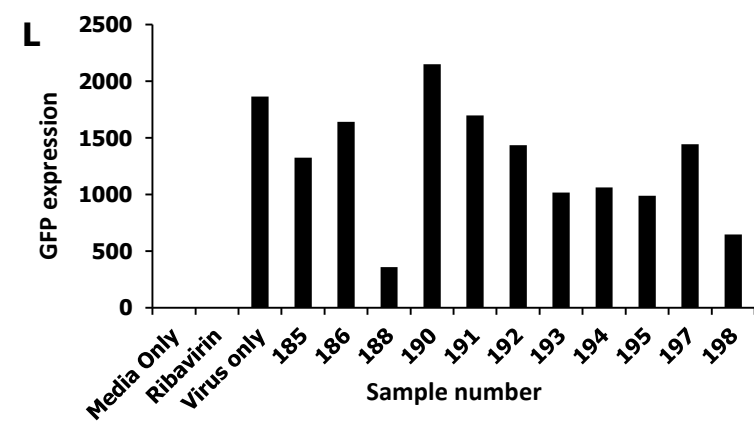

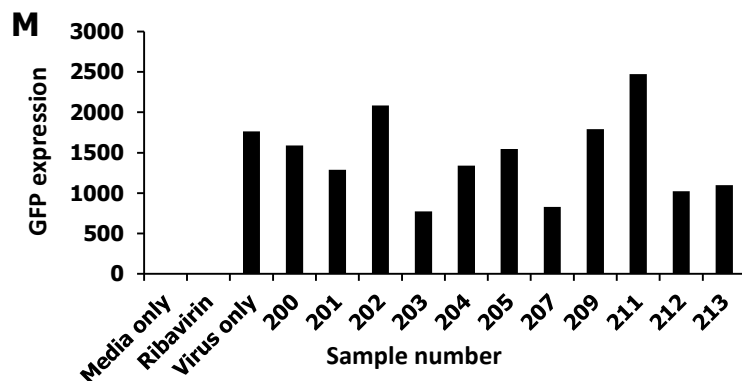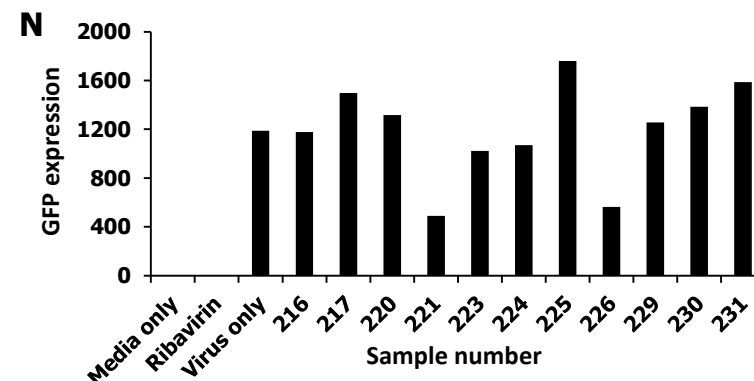

**Figure S1. Herb extract library screening results.** HEp2 cells were seeded into 96 well tissue culture black plates (SPL) with the cell number of  $2.5 \times 10^4$  cells/well. Twelve hours later, the medium was changed to 1% fetal bovine serum (FBS) containing Dulbecco's Modified Eagle's Medium (DMEM) and cells were infected with RSV-GFP (0.1MOI) or kept uninfected. Two hours later, the medium was replaced with 10% FBS containing DMEM and cells were treated with 30  $\mu$ g/mL of herb extracts or 30  $\mu$ M of ribavirin as positive control. Cells without any treatment regard as virus only. (A-N) At 48 hpi medium was replaced by autoclave PBS and GFP absorbance levels were measured by Gloma multi-detection luminometer (Promega). Candidates that reduced more than 80% GFP absorbance with respective to virus only treatment of same experiment were selected for second round.

**A**

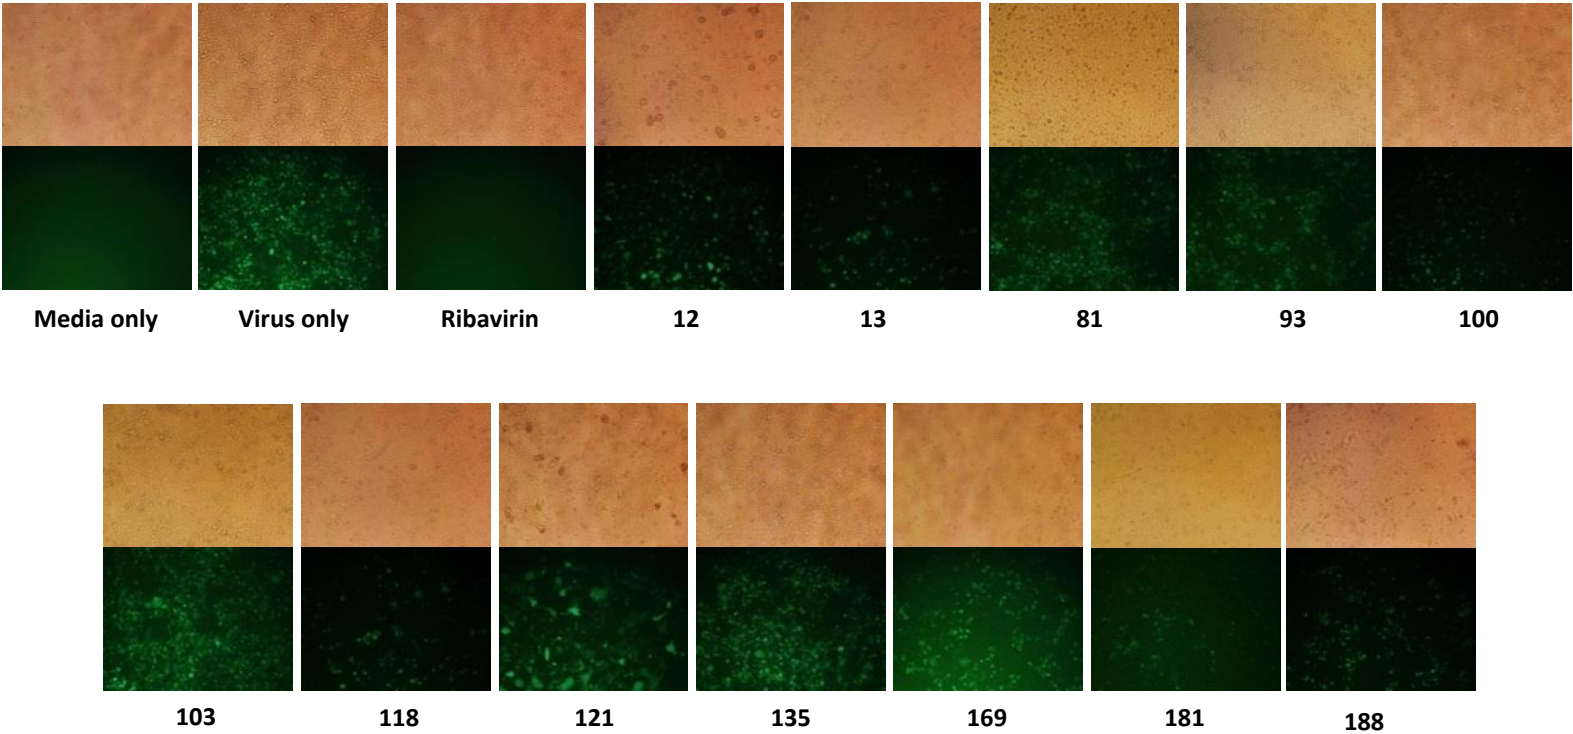

**B**

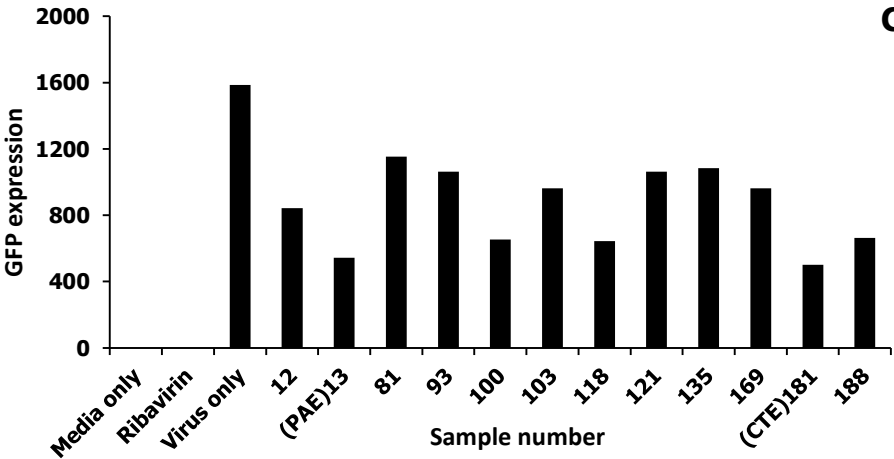

**C**

Selected samples with anti-RSV effect

| Number   | Sample number |
|----------|---------------|
| 01 (PAE) | 13            |
| 02       | 100           |
| 03       | 118           |
| 04 (CTE) | 181           |

**Figure S2. Selected herb extracts second round screening results.** HEp2 cells were seeded into 12 well cell culture plates with the cell number of  $2.5 \times 10^5$  cells/well. Twelve hours later, the medium was changed to 1% fetal bovine serum (FBS) containing Dulbecco's Modified Eagle's Medium (DMEM) and cells were infected with RSV-GFP (0.1MOI) or kept uninfected. Two hours later, the medium was replaced with 10% FBS containing DMEM and cells were treated with 30  $\mu\text{g/mL}$  of herb extracts or 30  $\mu\text{M}$  of ribavirin as positive control. Cells without any treatment regard as virus only. **(A)** After 48 h, images were obtained (200  $\times$  magnification). **(B)** GFP absorbance levels were measured by Gloma multi-detection luminometer (Promega). **(C)** Candidates that reduced GFP absorbance with no cytotoxicity were selected for future experiments (PAE#13, CTE#181).
